# Supplementary material for: 1,25 (OH)2D3 treatment alters the granulomatous response in M. tuberculosis infected mice
Source: PubMed Central journal article supplement (PMC5048147; doi:10.1038/srep34469), 2016-10-04
Supplement: srep34469-s1.pdf [file srep34469-s1.pdf]

**1,25 (OH)<sub>2</sub>D<sub>3</sub> treatment alters the granulomatous response in *M. tuberculosis* infected mice**

Kamlesh Bhatt<sup>1, \*</sup>, Wasiulla Rafi<sup>1, §</sup>, Neel Shah<sup>1, ‡</sup>, Sylvia Christakos<sup>2</sup> and Padmini Salgame<sup>1</sup>

<sup>1</sup> Department of Medicine, Center for Emerging Pathogens, Rutgers, New Jersey Medical School, Newark, NJ, USA.

<sup>2</sup> Department of Microbiology, Biochemistry and Molecular Genetics, Rutgers, New Jersey Medical School, Newark, New Jersey, USA.

§ *Current address*: Ogilvy Commonwealth Worldwide, 440 Interpace Parkway, Parsippany, New Jersey, USA

‡ *Current address*: Rowan University School of Osteopathic Medicine, Stratford, New Jersey, USA.

\*Correspondence to: [Bhattka@njms.rutgers.edu](mailto:Bhattka@njms.rutgers.edu)

## Supplementary Figures

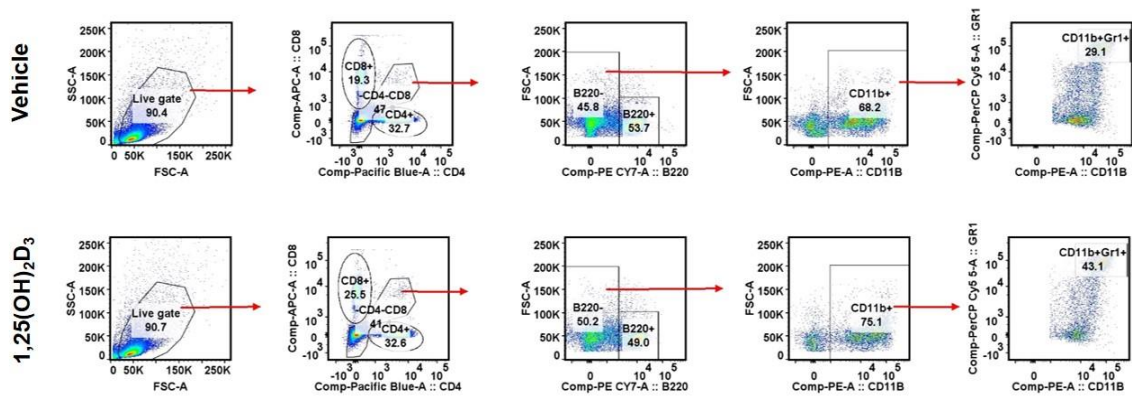

Figure S1: Sequential gating strategy to identify various cell populations (Figure 1) derived from single cell suspensions from the Mtb infected lungs.

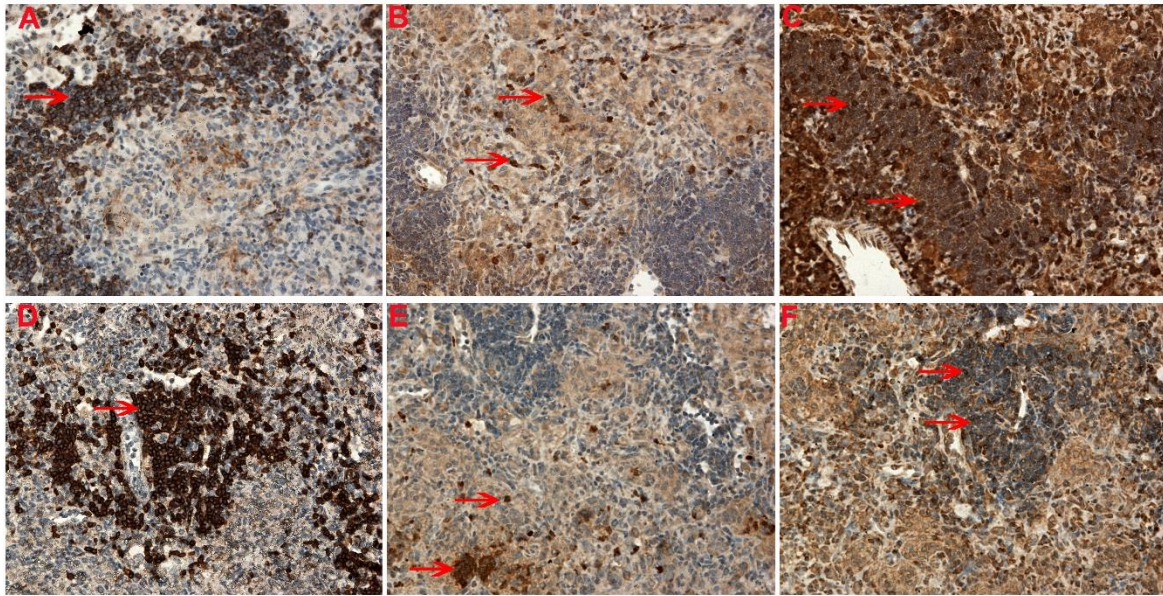

Figure S2: Boxed area in Figure 3 at 200X magnification. Arrows indicate the stained cells in the tissue.
